# Supplementary material
Source: PubMed Central journal article supplement (PMC7749007)

# Supplementary Figure 1

A)

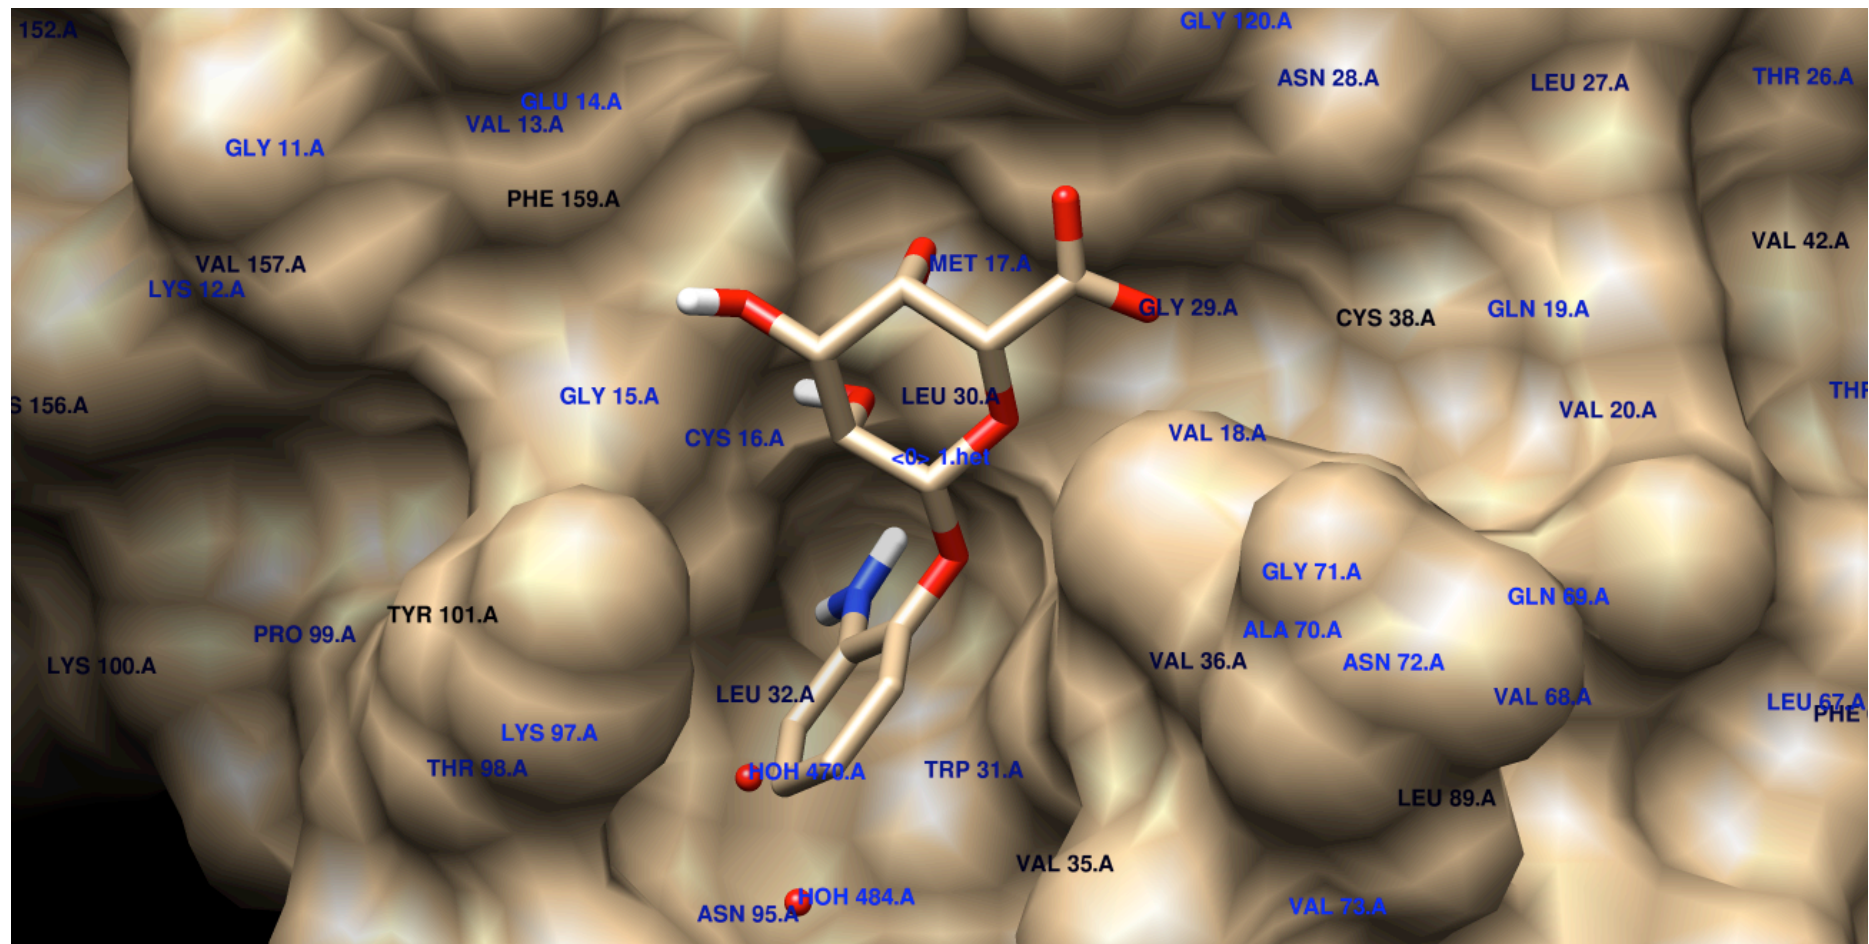

B)

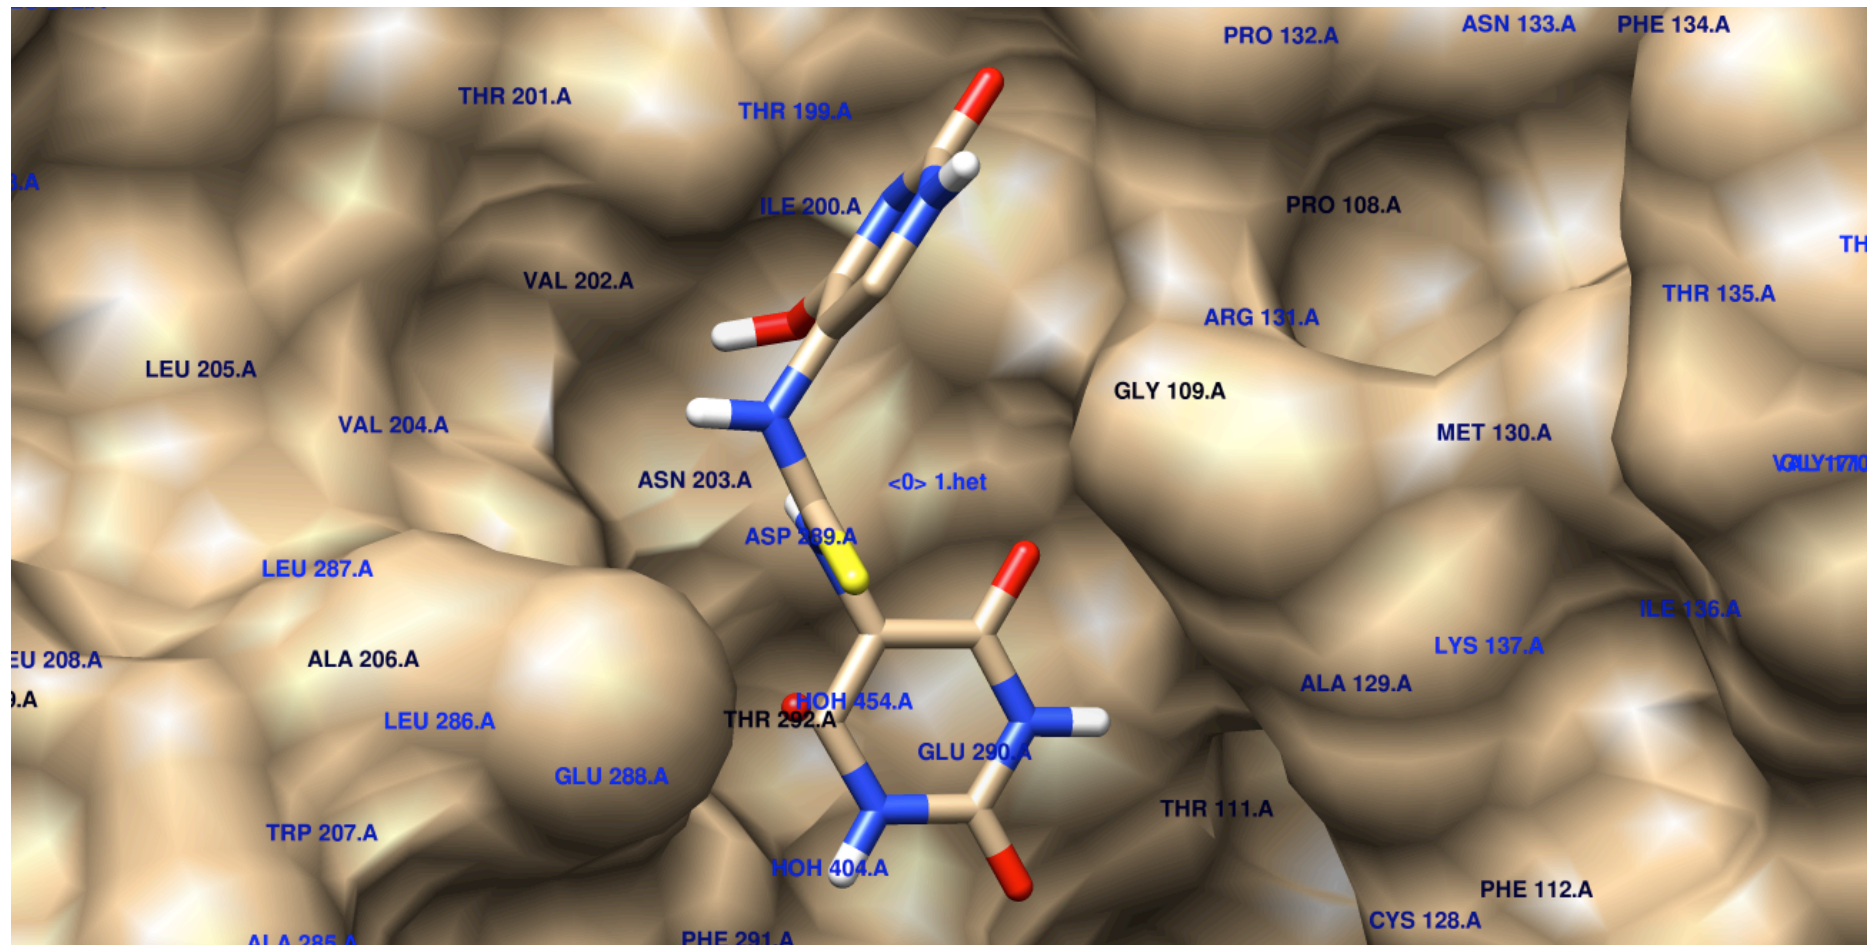

C)

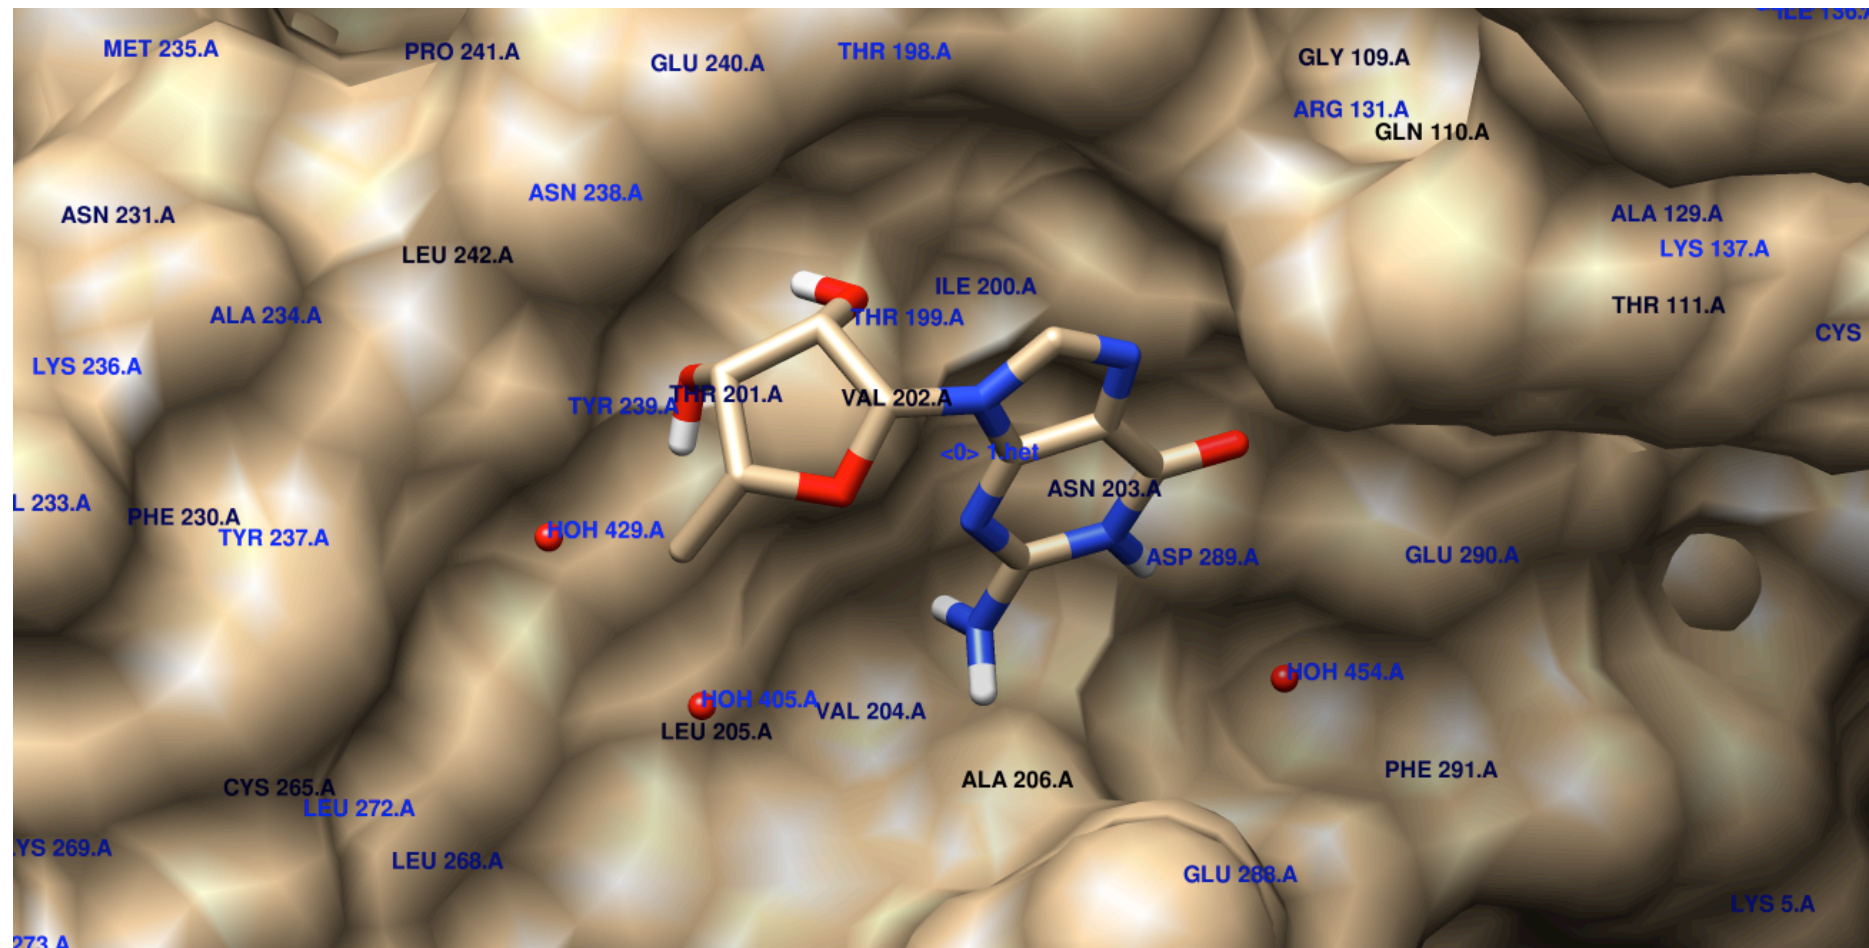

Supplement: 13337_2020_627_MOESM1_ESM.pdf [file 13337_2020_627_MOESM1_ESM.pdf]
